# Supplementary material for: Adipose tissue hyaluronan production improves systemic glucose homeostasis and primes adipocytes for CL 316,243-stimulated lipolysis
Source: PubMed Central journal article supplement (PMC8355239; doi:10.1038/s41467-021-25025-4), 2021-08-10
Supplement: 41467_2021_25025_MOESM1_ESM.pdf [file 41467_2021_25025_MOESM1_ESM.pdf]

**A**

Food Intake

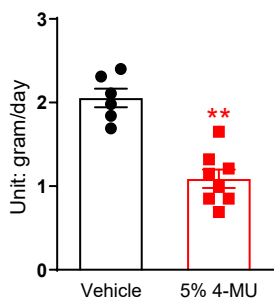**B**

Weight Loss

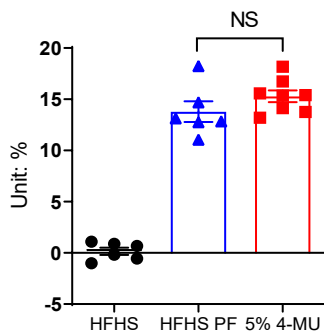**C**

Food Intake

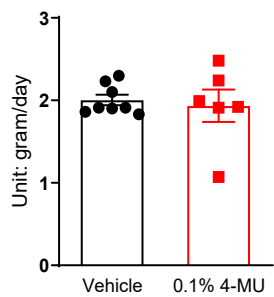**D**

Weight Gain

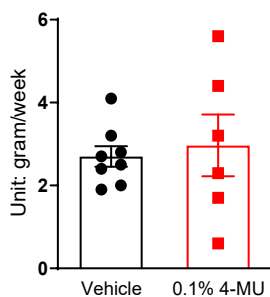**E**

Glucose Tolerance Test

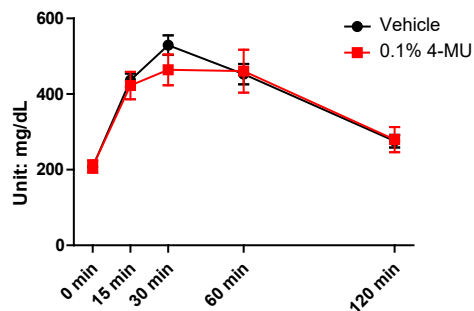

### Supplementary Fig. 1: 4-MU treatment on metabolic fitness

- A. 4-MU HFHS diet treatment suppresses food intake after diet switch (n = 6 mice for control, n = 8 mice for 4-MU treatment group). Two-tailed t-test,  $p < 0.0001$ .
- B. Body weight loss during 1-week 4-MU pair feeding regimen (n = 6 mice for control, n = 6 mice for pair-fed, n=8 for 4-MU treatment group). One-way ANOVA followed by Bonferroni's multiple comparisons test.
- C. Food intake in mice treated with 0.1% 4-MU HFHS diet (n = 8 mice for control, n = 6 mice for 4-MU treatment group).
- D. Body weight gain in mice treated with 0.1% 4-MU HFHS diet for two weeks (n = 8 mice for control, n = 6 mice for 4-MU treatment group).
- E. Glucose tolerance in mice treated with 0.1% 4-MU HFHS diet for two weeks (n = 8 mice for control, n = 6 mice for 4-MU treatment group)

All data are presented as Mean  $\pm$  s.e.m. \*\* indicates  $p \leq 0.01$ . Two-tailed t-test (C) (D). Two-way ANOVA (E).

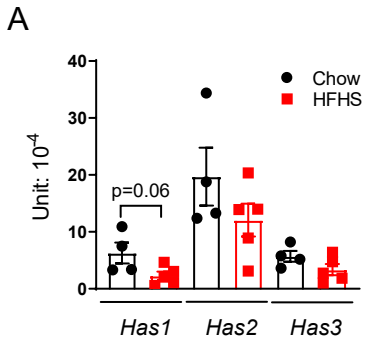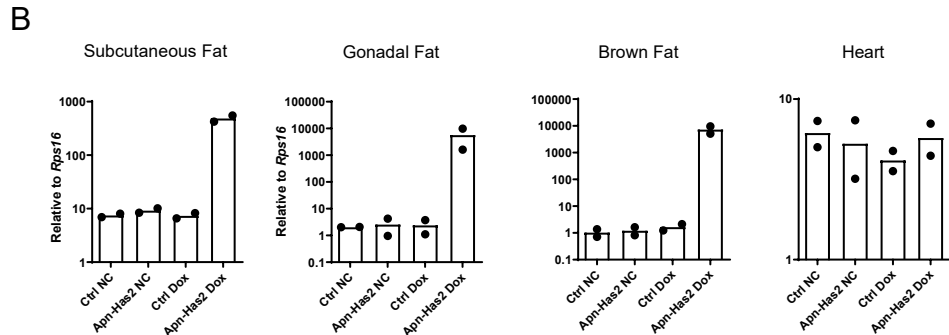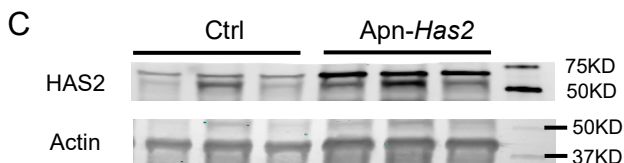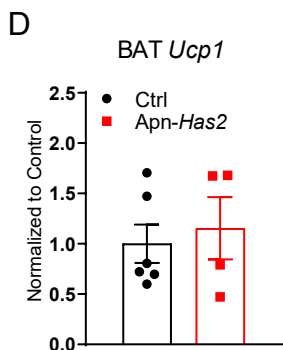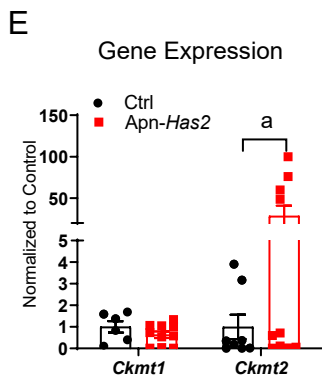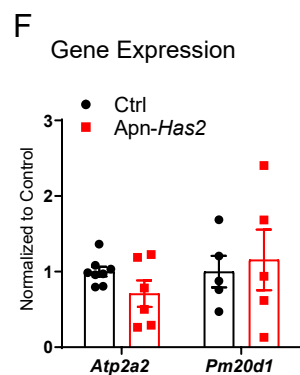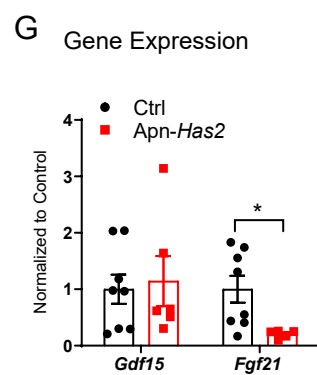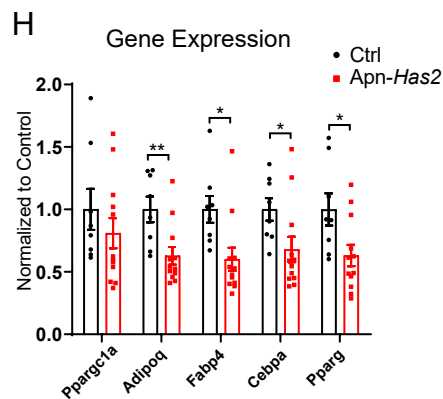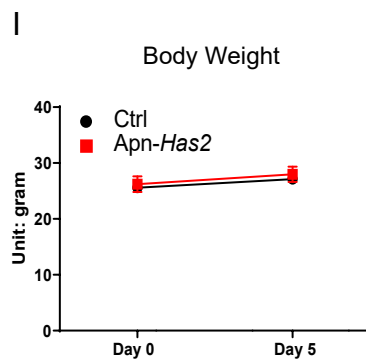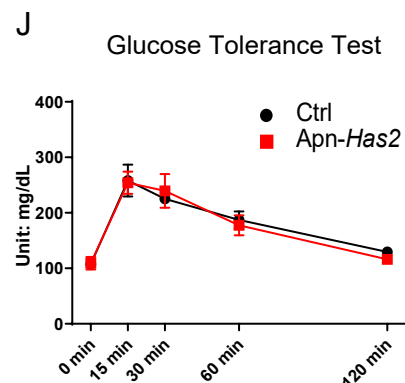

## Supplementary Fig. 2: Verification and characterization of Tre-*Has2* animals

- A. *Has1*, *Has2* and *Has3* expression levels in the adipose tissue on normal chow (NC) or 8 weeks of HFHS diet (n = 4 mice for NC, 5 mice for HFHS treatment). Multiple two-tailed *t*-test,  $p = 0.0631, 0.2101, 0.1373$  for *Has1*, *Has2* and *Has3*, respectively.
- B. *Has2* expression in subcutaneous, gonadal and brown adipose tissues, as well as in the heart after 5-day Dox600 chow treatment (n = 2 mice).
- C. HAS2 protein levels in Apn-*Has2* inguinal adipose tissue (n = 3 mice).
- D. Expression of *Ucp1* in Apn-*Has2* brown adipose tissue (BAT) after 5-day Dox600 chow treatment (n = 6 mice for control, n = 4 mice for Apn-*Has2* mice).
- E. Expression of *Ckmt1* and *Ckmt2* in Apn-*Has2* inguinal adipose tissue after 5-day Dox600 chow treatment (n = 8 mice for control, n = 10 mice for Apn-*Has2* mice). For *Ckmt1*, two samples in Ctrl group were not detected. Two-tailed *t*-test. a:  $p = 0.051$ .
- F. Expression of *Atp2a2* and *Pm20d1* in Apn-*Has2* inguinal adipose tissue after 8-week Dox600 HFHS diet treatment (n = 8 mice for control, n = 6 mice for Apn-*Has2* mice). For *Pm20d1*, three samples in Ctrl group, one sample in Apn-*Has2* group were not detected.
- G. Expression of *Gdf15* and *Fgf21* in Apn-*Has2* inguinal adipose tissue after 8-week Dox600 HFHS diet treatment (n = 8 mice for control, n = 6 mice for Apn-*Has2* mice). For *Fgf21*, one sample in Apn-*Has2* group were not detected. Multiple two-tailed *t*-test,  $p = 0.7699, 0.0256$  for *Gdf15* and *Fgf21*, respectively.
- H. Expression of adipogenesis related gene in Apn-*Has2* inguinal adipose tissue after 5-day Dox600 chow treatment (n = 8 mice for control, n = 12 mice for Apn-*Has2* mice). Multiple two-tailed *t*-test,  $p = 0.3557, 0.0064, 0.0123, 0.0405, 0.0228$  for *Ppargc1a*, *Adipoq*, *Fabp4*, *Cebpa*, and *Pparg*, respectively.

I: Body weights after 5-day Dox600 chow diet treatment (n = 4 mice per genotype).

J: Glucose tolerance after 5-day Dox600 chow diet treatment (n = 4 mice per genotype).

All data are presented as Mean  $\pm$  s.e.m. \* indicates  $p \leq 0.05$ , \*\* indicates  $p \leq 0.01$ . Two-tailed *t*-test

(D). Multiple *t*-test (F). Two-way ANOVA (I) (J).

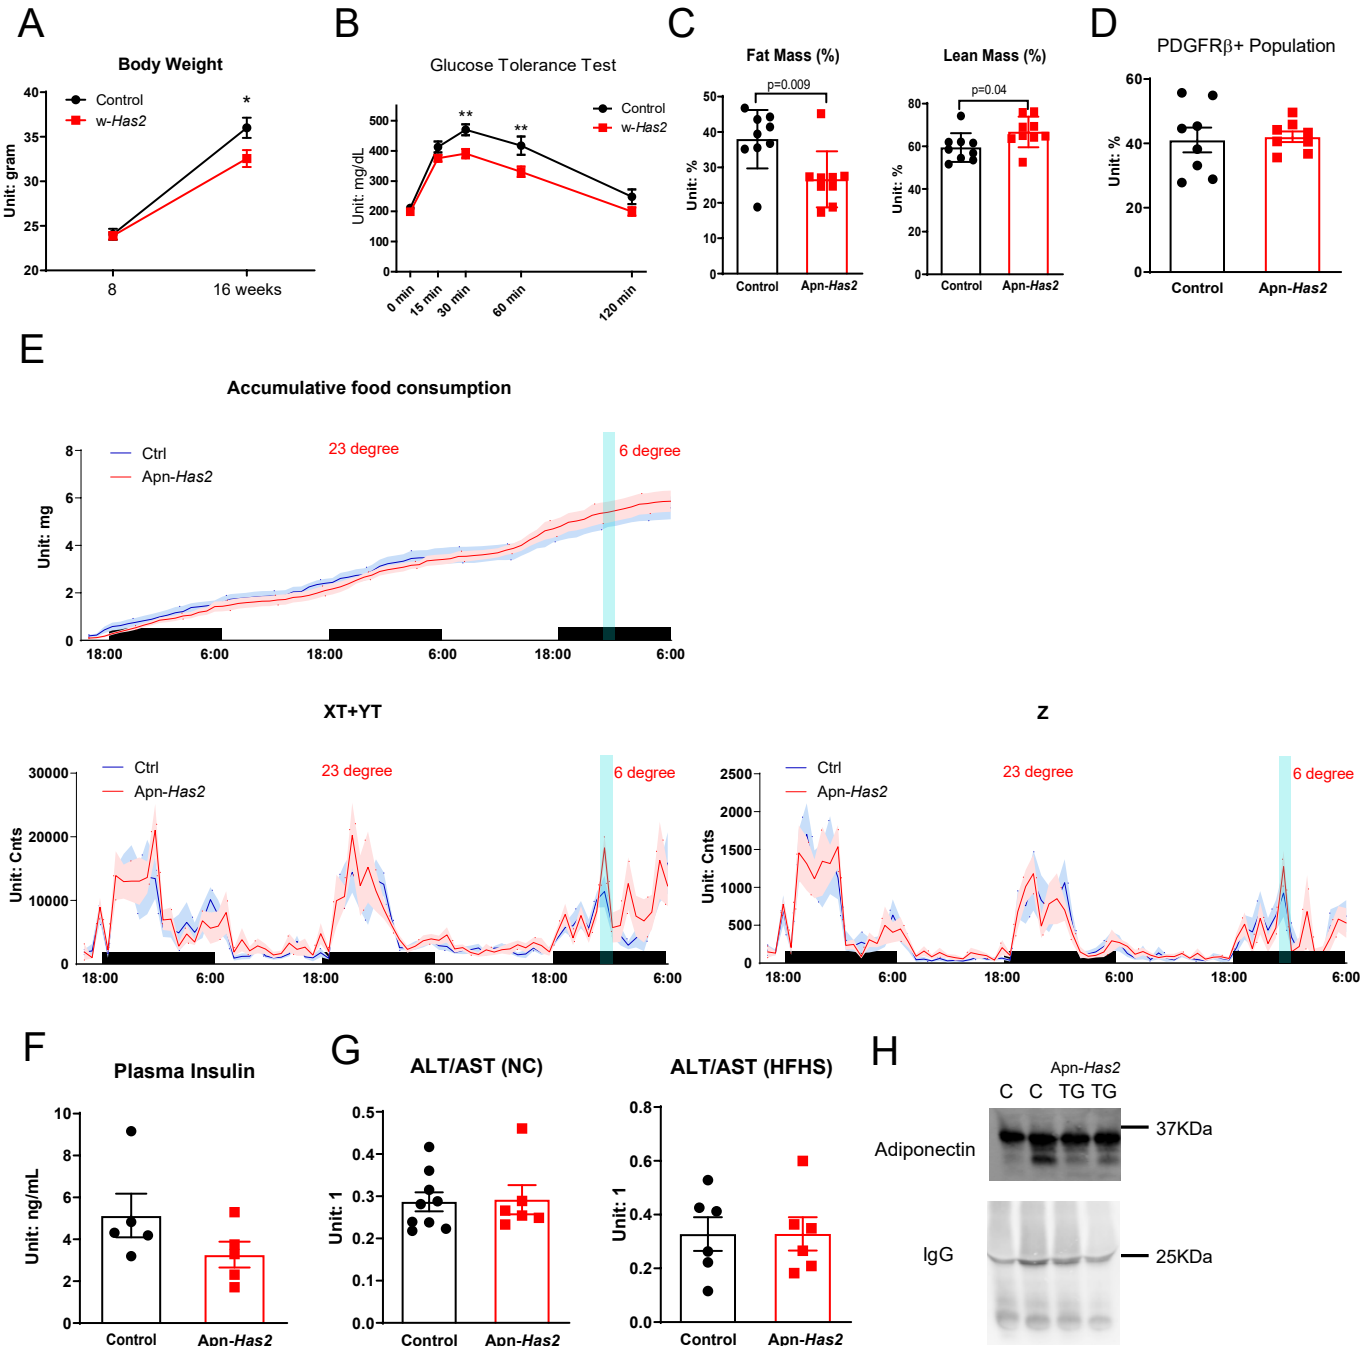

### Supplementary Fig. 3: Effects of *Has2* overexpression on metabolic profile

- A: Starting and terminal body weight of *w-Has2* mice after 8 weeks of Dox10 HFHS diet treatment (n = 8 mice for control, n = 11 mice for *w-Has2* mice). 2way ANOVA followed by Sidak's multiple comparisons test, control vs. *w-Has2*, adjusted  $p = 0.9897$  and  $0.0115$  for Before and After, respectively.
- B: Glucose tolerance test for *w-Has2* mice after 8 weeks of Dox10 HFHS diet treatment (n = 8 mice for control, n = 11 mice for *w-Has2* mice). 2way ANOVA followed by Sidak's multiple comparisons test, adjusted  $p$  value =  $0.9914$ ,  $0.4654$ ,  $0.0063$ ,  $0.0022$ ,  $0.1910$  for 0 min, 15 min, 30 min, 60 min and 120 min, respectively.
- C: Fat mass and lean mass expressed as percentage of body weight of *Apn-Has2* mice after 7 weeks Dox600 HFHS treatment (n = 9 mice per genotype). Two-tailed  $t$ -test.
- D: Adipocyte PDGFR $\beta$ + progenitor population in *Apn-Has2* inguinal adipose stromal vascular fraction after 8 weeks of Dox600 HFHS treatment (n = 8 mice per genotype).
- E: Cumulative food consumption, XT+YT activity and Z activity measured in metabolic cage experiment (n = 8 mice per genotype).
- F: 4-h fasting insulin levels between control and *Apn-Has2* mice after 8 weeks of Dox600 HFHS treatment (n = 5 mice per genotype).
- G: Serum ALT/AST ratio from *Apn-Has2* on Dox600 chow diet (NC) or Dox600 HFHS diet (HFHS) for 16 weeks (under NC: n = 9 mice for control, n = 6 mice for *Apn-Has2*; under HFHS: n = 6 mice for control, n = 6 mice for *Apn-Has2*).
- H: Representative blot showing serum adiponectin levels in control and *Apn-Has2* mice after 16 weeks Dox600 HFHS treatment.

All data are presented as Mean  $\pm$  s.e.m. \* indicates  $p \leq 0.05$ , \*\* indicates  $p \leq 0.01$ . Two-tailed *t*-test

(D) (F) (G). Two-way ANOVA (E).



**A**

Serum HA after Oral HA Gavage

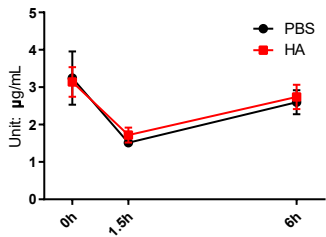**B**

Serum HA after HA i.p. Injection

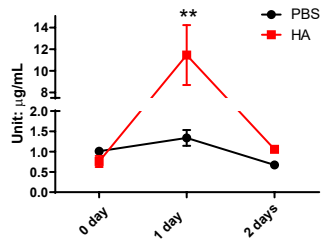**C**

Body Weight

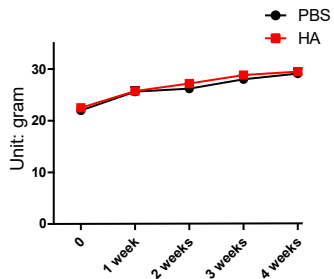**D**

Daily Food Intake

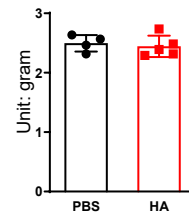

#### Supplementary Fig. 4: Effects of HA treatment of mice

- A. Serum HA levels after HA oral gavage (n = 4 mice per treatment).
- B. Serum HA levels 2 days after an i.p. injection of HA (50 mg/kg body weight) (n = 4 mice per treatment). 2way ANOVA followed by Sidak's multiple comparisons test, adjusted  $p$  value = 0.9981, <0.0001, 0.9935 for 0 day, 1 day, 2 days, respectively.
- C. Body weight during 4 weeks of HA treatment. Mice were treated with HFHS diet concurrently (n = 8 mice per treatment).
- D. Food intake after initiation of the 4-week HA treatment regimen (n = 4 mice for PBS, n = 5 mice for HA treatment).

All data are presented as Mean  $\pm$  s.e.m. \*\* indicates  $p \leq 0.01$ . Two-tailed  $t$ -test (D). Two-way ANOVA (A) (C).

**A**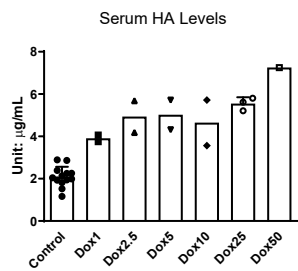**B**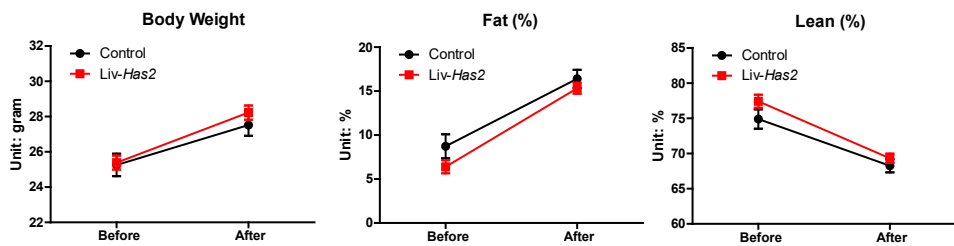**C**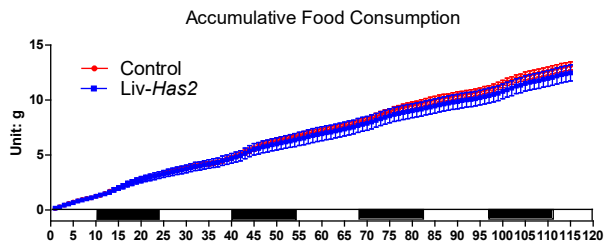**D**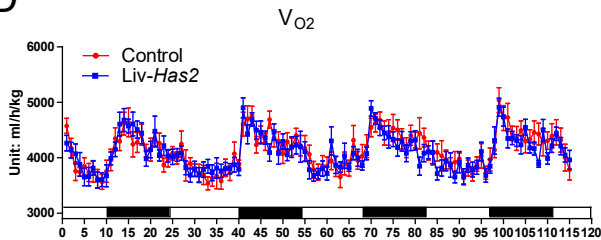**E**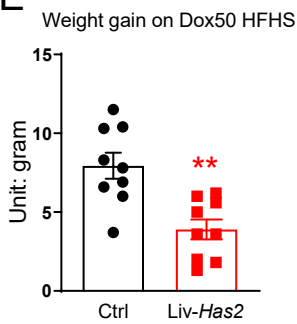**F**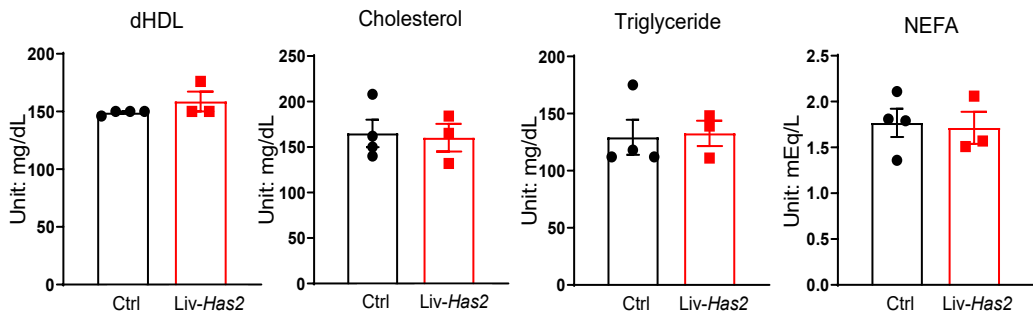**G**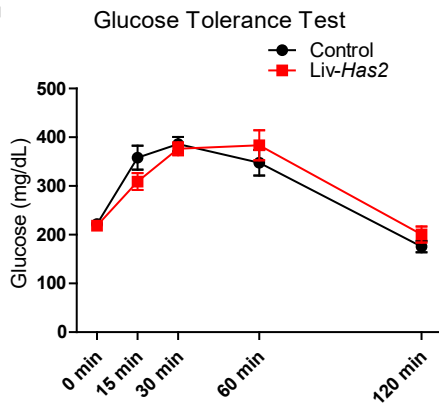**H**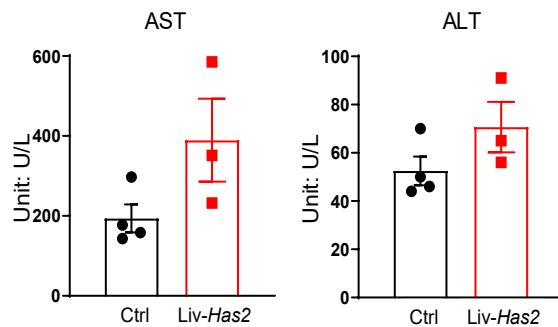

### Supplementary Fig. 5: Hepatic *Has2* overexpression on systemic metabolism

- A: Doxycycline dose-dependent increase of serum HA in Liv-*Has2* mice after five days of doxycycline HFHS diet treatment. Each data point is plotted on the graph. (n = 13, 2, 2, 2, 2, 3, 1 mice for HFHS diet containing 0, 1, 2.5, 5, 10, 25, 50 mg/kg doxycycline, respectively).
- B: Body weight, fat mass and lean mass before and after the metabolic cage experiment referred in Fig 6D (n = 12 mice per genotype).
- C: Accumulative food intake and water consumption during the metabolic cage experiment referred in Fig 6D (n = 12 mice per genotype).
- D: O<sub>2</sub> consumption (VO<sub>2</sub>) and CO<sub>2</sub> production (VCO<sub>2</sub>) during the metabolic cage experiment referred in Fig 6D (n = 12 mice per genotype).
- E: Weight gain for Liv-*Has2* mice treated with Dox50 HFHS diet for four weeks (n = 9 mice per genotype). Two-tailed *t*-test, *p* = 0.0013.
- F: Serum lipids levels in Liv-*Has2* mice treated with Dox50 HFHS diet for four weeks (n = 4 mice for control, n = 3 mice for Liv-*Has2*).
- G: Glucose tolerance for Liv-*Has2* mice treated with Dox50 HFHS diet for four weeks. (n = 4 mice for control, n = 3 mice for Liv-*Has2*).
- H: Serum AST and ALT activities in Liv-*Has2* mice treated with Dox50 HFHS diet for four weeks (n = 4 mice for control, n = 3 mice for Liv-*Has2*).

All data are presented as Mean ± s.e.m. \*\* indicates  $p \leq 0.01$ . Two-tailed *t*-test (F) (H). Two-way ANOVA (B) (C) (D) (G).



### Supplementary Fig. 6: Additional metabolic characterization of *Apn-Has2* and *Liv-Has2* mice

- A: dHDL, total Cholesterol, triglyceride and total NEFA levels in *Apn-Has2* mice on Dox600 chow diet and Dox600 HFHS diet for 12 weeks. (n = 11 mice for control on normal diet, n = 4 mice for *Apn-Has2* on normal diet, n = 5 mice for control on HFHS diet, n = 6 mice for *Apn-Has2* on HFHS diet). 2way ANOVA followed by Sidak's multiple comparisons test.  $p = 0.1058$ .
- B: Gene expression in adipose tissue overexpressing *Has2* after 5 days of Dox600 chow diet treatment (n = 8 mice for control, n = 12 mice for *Apn-Has2* mice). One sample in *Apn-Has2* group was not detected for *Aqp7* gene. Multiple two-tailed *t*-test.
- C: Serum total ketone body concentration after 4-week HA treatment outlined in Fig. 5E (n = 8 mice per treatment). Two-tailed *t*-test,  $p = 0.0005$ .
- D: Representative liver histology of *Liv-Has2* mice after 16 weeks Dox10 HFHS treatment. Scale bar = 100  $\mu\text{m}$ .
- E: Hepatic triglyceride contents of *Liv-Has2* mice after 16 weeks Dox10 HFHS treatment (n = 10 per genotype). Two-tailed *t*-test,  $p = 0.0121$ .

All data are presented as Mean  $\pm$  s.e.m. \* indicates  $p \leq 0.05$ , \*\* indicates  $p \leq 0.01$ .

**A**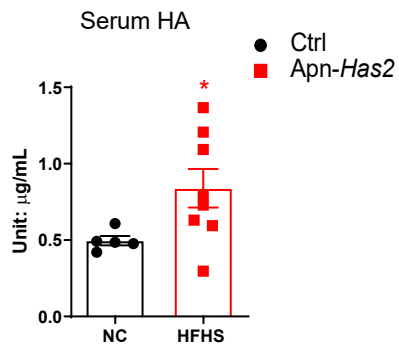**B**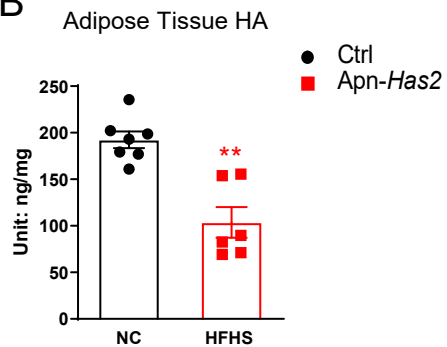

**Supplementary Fig. 7: Chronic HFHS treatment on serum HA and adipose tissue HA levels**

A: Serum HA levels after 16 weeks of dietary treatment. (n = 5 mice for normal chow, n = 8 mice for HFHS diet). Two-tailed *t*-test,  $p = 0.0311$ .

B: Inguinal adipose tissue HA levels after 16 weeks of dietary treatment. (n=7 for normal chow, n=6 for HFH diet). Two-tailed *t*-test,  $p = 0.0004$ .

All data are presented as Mean  $\pm$  s.e.m. \* indicates  $p \leq 0.05$ , \*\* indicates  $p \leq 0.01$ .



Supplementary Table 1: List of primers used in the paper.

| Name of the Gene | Name of the primer | Sequence (5' to 3')     |
|------------------|--------------------|-------------------------|
| Has1             | Has1-f             | GCGAGCACTCACGATCATC     |
|                  | Has1-r             | AGGAGTCCATAGCGATCTGAAG  |
| Has2             | Has2-f             | TGTGAGAGGTTTCTATGTGTCCT |
|                  | Has2-r             | ACCGTACAGTCCAAATGAGAAGT |
| Has3             | Has3-f             | CTAGCCTTCTAGTCTCTGG     |
|                  | Has3-r             | GGCTATACTGTTCTGGCTTC    |
| Col1a1           | Col1a1-f           | GATGGATTCCCGTTCGAGTA    |
|                  | Col1a1-r           | ATGTAGGCTACGCTGTTCTT    |
| Col1a2           | Col1a2-f           | TACAACGTAGAAGGGGTGTC    |
|                  | Col1a2-r           | GTGATGTTCTGAGAAGCACG    |
| Col4a1           | Col4a1-f           | TGTGGATCGGCTATTCCTTC    |
|                  | Col4a1-r           | GCTTCTTGAACATCTCGCTT    |
| Col4a3           | Col4a3-f           | CACTGGTACAAGAATGCGAG    |
|                  | Col4a3-r           | ATGTGCACGTTTGTTTCCTT    |
| Col4a5           | Col4a5-f           | TCAAACAACAGAAGCACCAC    |
|                  | Col4a5-r           | GAAAGGCATGGTACTGAAGC    |
| Aqp7             | Aqp7-f             | GTTTTGGATTCGGAGTGACC    |
|                  | Aqp7-r             | CCCAGCACATATACAGGGAA    |
| Ucp1             | UCP1-f             | ACTGCCACACCTCCAGTCATT   |
|                  | UCP1-r             | CTTGCCTCACTCAGGATTGG    |
| Adrb1            | Adrb1-f            | GAACCCTGCAACCTGTCGTC    |
|                  | Adrb1-r            | CCAGCAGTAGGCCCATACC     |
| Adrb2            | Adrb2-f            | GGGAACGACAGCGACTTCTT    |
|                  | Adrb2-r            | GCCAGGACGATAACCGACAT    |
| Adrb3            | Adrb3-f            | CCTTGGGCGAAACTGGTTG     |
|                  | Adrb3-r            | GTTGGTGACAGCTAGGTAGCG   |
| Pde3b            | Pde3b-f            | AAAGCGCAGCCGGTTACTAT    |
|                  | Pde3b-r            | CACCACTGCTTCAAGTCCCAG   |
| Pnpla2           | Atgl-f             | CAACGCCACTCACATCTACGG   |

|          |                      |                                                    |
|----------|----------------------|----------------------------------------------------|
|          | Atgl-r               | GGACACCTCAATAATGTTGGCAC                            |
| Lipe     | Hsl-f<br>Hsl-r       | CCAGCCTGAGGGCTTACTG<br>CTCCATTGACTGTGACATCTCG      |
| Ckmt1    | Ckmt1-f<br>Ckmt1-r   | TGAGGAGACCTATGAGGTATTTGC<br>TCATCAAAGTAGCCAGAACGGA |
| Ckmt2    | Ckmt2-f<br>Ckmt2-r   | GCATGGTGGCTGGTGATGAG<br>AAACTGCCCGTGAGTAATCTTG     |
| Atp2a2   | Atp2a2-f<br>Atp2a2-r | GAGAACGCTCACACAAAGACC<br>CAATTCGTTGGAGCCCCAT       |
| Pm20d1   | Pm20d-f<br>Pm20d-r   | CTTCTCTTTTTCGCTACGGTCT<br>CACCTTTCAGCGCCTCTTTTAT   |
| Gdf15    | Gdf15-f<br>Gdf15-r   | CTGGCAATGCCTGAACAGCG<br>GGTCAGGACTTGGTTCTGAG       |
| Fgf21    | Fgf21-f<br>Fgf21-r   | CTGCTGGGGGTCTACCAAG<br>CTGCGCCTACCACTGTTCC         |
| Ppargc1a | PGC1a-f<br>PGC1a-r   | AGCCGTGACCACTGACAACGAG<br>GCTGCATGGTTCTGAGTGCTAAG  |
| Adipoq   | Apn-f<br>Apn-r       | TGTTCTCTTAATCCTGCCCA<br>CCAACCTGCACAAGTTCCTT       |
| Fabp4    | Fabp4-f<br>Fabp4-r   | AAGGTGAAGAGCATCATAACCCT<br>TCACGCCTTTCATAACACATTCC |
| Cebpa    | Cebpa-f<br>Cebpa-r   | CAAGAACAGCAACGAGTACCG<br>GTCACTGGTCAACTCCAGCAC     |
| Pparg    | Pparg-f<br>Pparg-r   | TCGCTGATGCACTGCCTATG<br>GAGAGGTCCACAGAGCTGATT      |
