# Supplementary material for: Adipose tissue hyaluronan production improves systemic glucose homeostasis and primes adipocytes for CL 316,243-stimulated lipolysis
Source: PubMed Central journal article supplement (PMC8355239; doi:10.1038/s41467-021-25025-4), 2021-08-10
Supplement: 41467_2021_25025_MOESM2_ESM.pdf [file 41467_2021_25025_MOESM2_ESM.pdf]

## Reporting Summary

Nature Research wishes to improve the reproducibility of the work that we publish. This form provides structure for consistency and transparency in reporting. For further information on Nature Research policies, see our [Editorial Policies](#) and the [Editorial Policy Checklist](#).

### Statistics

For all statistical analyses, confirm that the following items are present in the figure legend, table legend, main text, or Methods section.

n/a Confirmed

- |                                     |                                     |                                                                                                                                                                                                                                                            |
|-------------------------------------|-------------------------------------|------------------------------------------------------------------------------------------------------------------------------------------------------------------------------------------------------------------------------------------------------------|
| <input type="checkbox"/>            | <input checked="" type="checkbox"/> | The exact sample size ( $n$ ) for each experimental group/condition, given as a discrete number and unit of measurement                                                                                                                                    |
| <input type="checkbox"/>            | <input checked="" type="checkbox"/> | A statement on whether measurements were taken from distinct samples or whether the same sample was measured repeatedly                                                                                                                                    |
| <input type="checkbox"/>            | <input checked="" type="checkbox"/> | The statistical test(s) used AND whether they are one- or two-sided<br><i>Only common tests should be described solely by name; describe more complex techniques in the Methods section.</i>                                                               |
| <input type="checkbox"/>            | <input checked="" type="checkbox"/> | A description of all covariates tested                                                                                                                                                                                                                     |
| <input type="checkbox"/>            | <input checked="" type="checkbox"/> | A description of any assumptions or corrections, such as tests of normality and adjustment for multiple comparisons                                                                                                                                        |
| <input type="checkbox"/>            | <input checked="" type="checkbox"/> | A full description of the statistical parameters including central tendency (e.g. means) or other basic estimates (e.g. regression coefficient) AND variation (e.g. standard deviation) or associated estimates of uncertainty (e.g. confidence intervals) |
| <input type="checkbox"/>            | <input checked="" type="checkbox"/> | For null hypothesis testing, the test statistic (e.g. $F$ , $t$ , $r$ ) with confidence intervals, effect sizes, degrees of freedom and $P$ value noted<br><i>Give <math>P</math> values as exact values whenever suitable.</i>                            |
| <input checked="" type="checkbox"/> | <input type="checkbox"/>            | For Bayesian analysis, information on the choice of priors and Markov chain Monte Carlo settings                                                                                                                                                           |
| <input checked="" type="checkbox"/> | <input type="checkbox"/>            | For hierarchical and complex designs, identification of the appropriate level for tests and full reporting of outcomes                                                                                                                                     |
| <input checked="" type="checkbox"/> | <input type="checkbox"/>            | Estimates of effect sizes (e.g. Cohen's $d$ , Pearson's $r$ ), indicating how they were calculated                                                                                                                                                         |

*Our web collection on [statistics for biologists](#) contains articles on many of the points above.*

### Software and code

Policy information about [availability of computer code](#)

Data collection

Data analysis

For manuscripts utilizing custom algorithms or software that are central to the research but not yet described in published literature, software must be made available to editors and reviewers. We strongly encourage code deposition in a community repository (e.g. GitHub). See the Nature Research [guidelines for submitting code & software](#) for further information.

### Data

Policy information about [availability of data](#)

All manuscripts must include a [data availability statement](#). This statement should provide the following information, where applicable:

- Accession codes, unique identifiers, or web links for publicly available datasets
- A list of figures that have associated raw data
- A description of any restrictions on data availability

## Field-specific reporting

Please select the one below that is the best fit for your research. If you are not sure, read the appropriate sections before making your selection.

Life sciences  Behavioural & social sciences  Ecological, evolutionary & environmental sciences

For a reference copy of the document with all sections, see [nature.com/documents/nr-reporting-summary-flat.pdf](https://www.nature.com/documents/nr-reporting-summary-flat.pdf)

## Life sciences study design

All studies must disclose on these points even when the disclosure is negative.

|                 |                                                                                                                                                                                                                                                                                                                                                                      |
|-----------------|----------------------------------------------------------------------------------------------------------------------------------------------------------------------------------------------------------------------------------------------------------------------------------------------------------------------------------------------------------------------|
| Sample size     | No statistical methods were used to determine sample size. Sample size was determined empirically or from sizes commonly published for the specific type of experiment. For all mouse studies, the n value corresponds to individual mice of a given treatment. For cell culture experiments, the n values correspond to the number of replicates in the experiment. |
| Data exclusions | Only data points generated in technically failed experiments were excluded. No data points were excluded using statistical methods.                                                                                                                                                                                                                                  |
| Replication     | Studies employing mice were not replicated, unless shown within this manuscript, due to ethical, logistical and financial limitations. All in vitro studies were repeated at least twice with similar results, except 2-DG glucose uptake, due to limited reagents and environmental concerns of using radioactive materials.                                        |
| Randomization   | All studies were performed with randomization when necessary. All animal groups were randomly assigned prior to treatment or experimentation. For in vitro studies, cultures were randomly assigned experimental conditions.                                                                                                                                         |
| Blinding        | All data analysis was conducted in a blinded manner. All in vivo experiments were conducted in a blinded manner. In vitro experiments were not blinded due to logistical issues.                                                                                                                                                                                     |

## Reporting for specific materials, systems and methods

We require information from authors about some types of materials, experimental systems and methods used in many studies. Here, indicate whether each material, system or method listed is relevant to your study. If you are not sure if a list item applies to your research, read the appropriate section before selecting a response.

### Materials & experimental systems

| n/a                                 | Involved in the study                                           |
|-------------------------------------|-----------------------------------------------------------------|
| <input type="checkbox"/>            | <input checked="" type="checkbox"/> Antibodies                  |
| <input type="checkbox"/>            | <input checked="" type="checkbox"/> Eukaryotic cell lines       |
| <input checked="" type="checkbox"/> | <input type="checkbox"/> Palaeontology and archaeology          |
| <input type="checkbox"/>            | <input checked="" type="checkbox"/> Animals and other organisms |
| <input type="checkbox"/>            | <input checked="" type="checkbox"/> Human research participants |
| <input checked="" type="checkbox"/> | <input type="checkbox"/> Clinical data                          |
| <input checked="" type="checkbox"/> | <input type="checkbox"/> Dual use research of concern           |

### Methods

| n/a                                 | Involved in the study                           |
|-------------------------------------|-------------------------------------------------|
| <input checked="" type="checkbox"/> | <input type="checkbox"/> ChIP-seq               |
| <input checked="" type="checkbox"/> | <input type="checkbox"/> Flow cytometry         |
| <input checked="" type="checkbox"/> | <input type="checkbox"/> MRI-based neuroimaging |

## Antibodies

### Antibodies used

Antibody Source Catalog number Dilution Application  
 HAS2, Santa Cruz Biotechnology, sc-34068 1:200 WB  
 HSL, Santa Cruz Biotechnology, sc-74489 1:200 WB  
 $\alpha$ -Tubulin, Santa Cruz Biotechnology, sc-53030 1:200 WB  
 Actin, Sigma, #A4700 1:1000 WB  
 Adiponectin, homemade 1:1000 WB  
 Goat anti-Mouse IRDye 680RD Li-cor 926-68070 1:10,000 WB  
 Goat anti-rabbit IRDye 800CW Li-cor 925-32211 1:10,000 WB  
 Goat anti-Rat DyLight 800 Thermo Fisher SA5-10024 1:10,000 WB

### Validation

Antibodies were validated by the information provided by the vendor (see below). Adiponectin antibody was validated through western blot of adiponectin whole body knockout mouse serum.  
 HAS2, Santa Cruz Biotechnology, sc-34068 <https://www.scbt.com/p/has2-antibody-y-14>  
 HSL, Santa Cruz Biotechnology, sc-74489 <https://www.scbt.com/p/hsl-antibody-g-7>  
 $\alpha$ -Tubulin, Santa Cruz Biotechnology, sc-53030 <https://www.scbt.com/p/alpha-tubulin-antibody-yol1-34>  
 Actin, Sigma, #A4700 <https://www.sigmaaldrich.com/catalog/product/sigma/a4700?lang=en&region=US>

## Eukaryotic cell lines

Policy information about [cell lines](#)

|                                                                      |                                                                                                          |
|----------------------------------------------------------------------|----------------------------------------------------------------------------------------------------------|
| Cell line source(s)                                                  | Met-1(fvb2) (RRID:CVCL_U373), acquired from Lonza (#1227), HEK-293 (ATCC® CRL-1573™), acquired from ATCC |
| Authentication                                                       | None of the cell line used were authenticated                                                            |
| Mycoplasma contamination                                             | The cell line was not tested for mycoplasma contamination                                                |
| Commonly misidentified lines<br>(See <a href="#">ICLAC</a> register) | No commonly misidentified cell lines were used in this study.                                            |

## Animals and other organisms

Policy information about [studies involving animals](#); [ARRIVE guidelines](#) recommended for reporting animal research

|                         |                                                                                                                                                                                                                                                                                                                                                                                                                                                                                                                                                                                                                                                                                                                                                                                                                                                                 |
|-------------------------|-----------------------------------------------------------------------------------------------------------------------------------------------------------------------------------------------------------------------------------------------------------------------------------------------------------------------------------------------------------------------------------------------------------------------------------------------------------------------------------------------------------------------------------------------------------------------------------------------------------------------------------------------------------------------------------------------------------------------------------------------------------------------------------------------------------------------------------------------------------------|
| Laboratory animals      | Experiments were conducted with mice age between 6-34 weeks, dependent on the duration of study. All mice used for these studies were on the pure C58BL/6J background and housed in a specific pathogen free facility under standard conditions of temperature (~22-degree Celsius) with 12-hour light/dark cycle, food and water available ad lib. Cages and water were changed every week. Adiponectin-rtTA, TRE-Has2 mice were generated in the lab. These mice were crossed to R26-M2rtTA (The Jackson Laboratory, B6.Cg-Gt(ROSA)26Sortm1(rtTA*M2)Jae/J, Strain: 006965), liver-specific albumin-Cre transgenic (The Jackson Laboratory, B6.Cg-Speer6-ps1Tg(Alb-cre)21Mgn/J, Stock No: 003574) or Rosa26-loxP-STOP-loxP-rtTA transgenic (The Jackson Laboratory, Gt(ROSA)26Sortm1(rtTA,EGFP)Nagy/J, Stock No: 005572) mice, as described in the manuscript. |
| Wild animals            | No wild animals were used in this paper                                                                                                                                                                                                                                                                                                                                                                                                                                                                                                                                                                                                                                                                                                                                                                                                                         |
| Field-collected samples | No field-collected samples were used in this paper                                                                                                                                                                                                                                                                                                                                                                                                                                                                                                                                                                                                                                                                                                                                                                                                              |
| Ethics oversight        | Institutional Animal Care and Use Committee of the University of Texas Southwestern Medical Center (Protocol number 2015-101207G) and Baylor College of Medicine (Protocol number AN-8158).                                                                                                                                                                                                                                                                                                                                                                                                                                                                                                                                                                                                                                                                     |

Note that full information on the approval of the study protocol must also be provided in the manuscript.

## Human research participants

Policy information about [studies involving human research participants](#)

|                            |                                                                                                                                                                               |
|----------------------------|-------------------------------------------------------------------------------------------------------------------------------------------------------------------------------|
| Population characteristics | Subject characteristics are summarized in Table 1.                                                                                                                            |
| Recruitment                | Participants were recruited using the Volunteers for Health database at Washington University School of Medicine and by local postings between April 2016 and September 2017. |
| Ethics oversight           | This study was approved by the Human Research Protection Office of Washington University (201512086)                                                                          |

Note that full information on the approval of the study protocol must also be provided in the manuscript.
